# Supplementary material for: Pore size analysis of >250 000 hypothetical zeolites
Source: Royal Society of Chemistry journal article supplement (doi:10.1039/c0cp02766a), 2011-01-01
Supplement: c0cp02766a.pdf [file c0cp02766a.pdf]

**Supplementary Information for**  
**Pore Size Analysis of > 250,000 Hypothetical Zeolites**  
*Emmanuel Haldoupis, Sankar Nair, and David S. Sholl*

|     | Measured Distance (Å) |
|-----|-----------------------|
| DDR | 8.000                 |
| CAS | 5.160                 |
| TSC | 15.371                |
| VFI | 8.589                 |
| CAN | 5.254                 |
| CFI | 5.264                 |
| MTW | 5.256                 |
| GOO | 6.550                 |
| MER | 9.954                 |
| DFT | 4.512                 |
| ETR | 8.426                 |
| MAZ | 7.618                 |
| LTF | 7.601                 |

**Table S.1:** Hopping distances used to calculate single component diffusivities of CH<sub>4</sub> in the infinite dilution limit using Transition State Theory in selected zeolites.

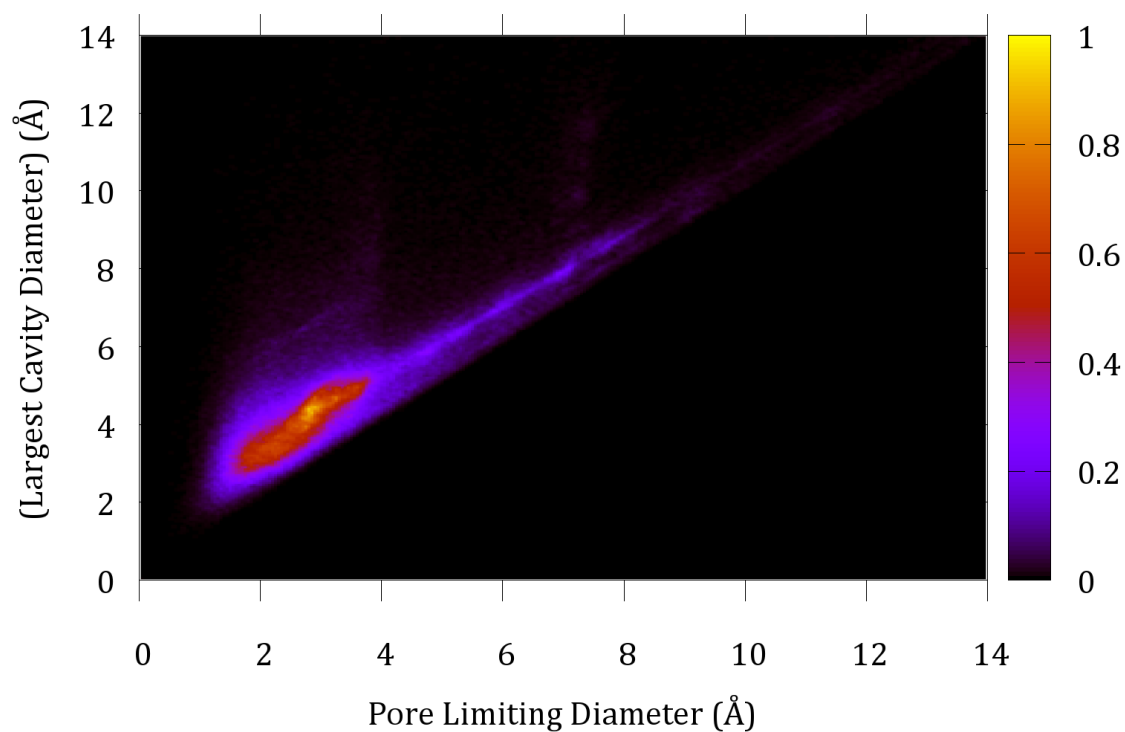

**Figure S.1** The frequency of observing crystal structures with varying PLD and LCD among the full set of hypothetical zeolites. The normalization used for the color code is the same as in Figure 6.

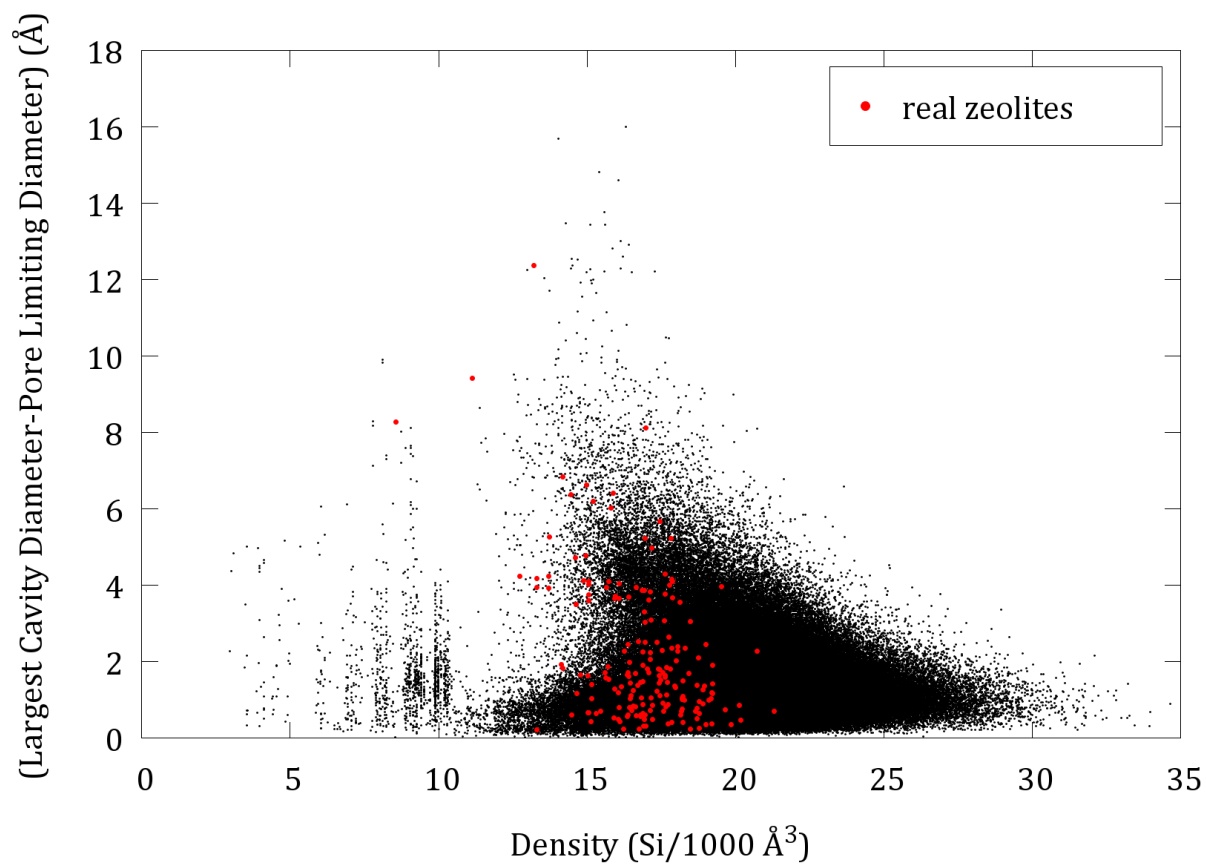

**Figure S.2:** The density plotted against the difference between the LCD and PLD for all the materials and the real zeolites.

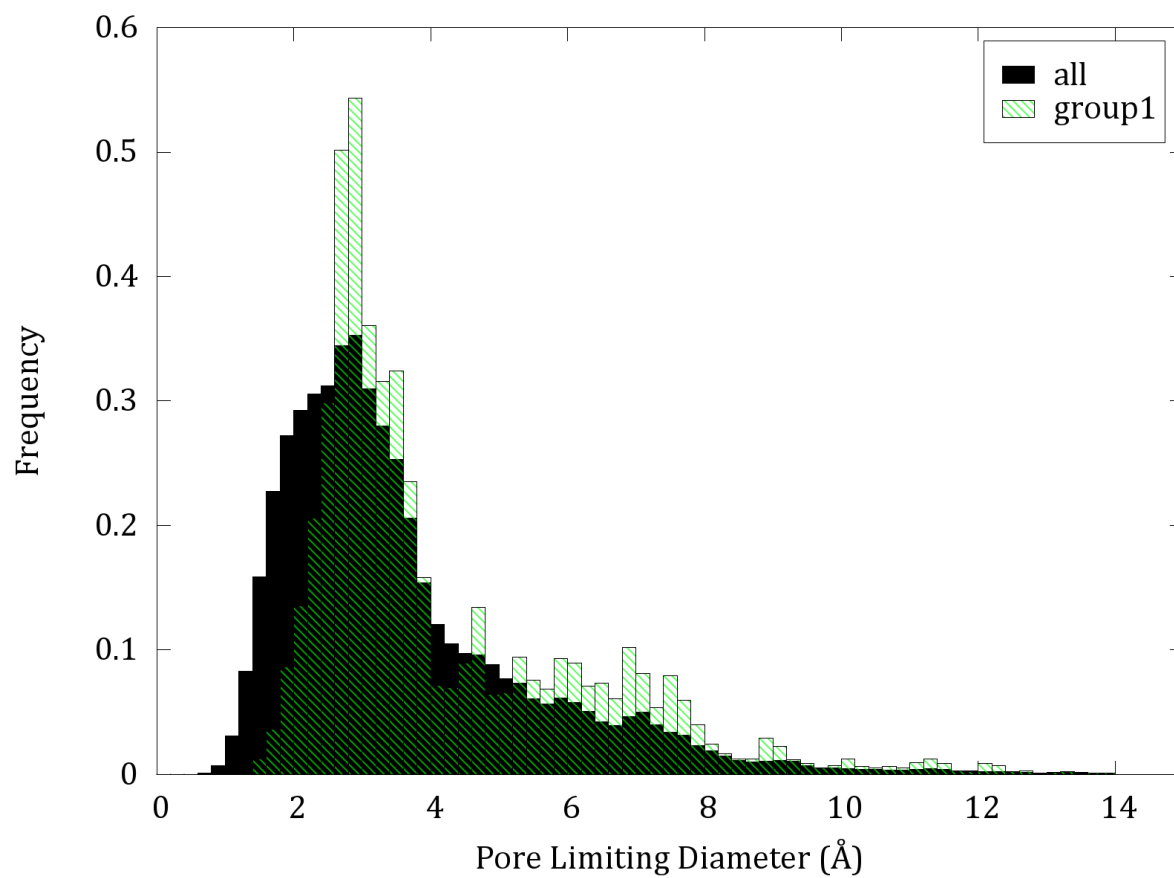

**Figure S.3:** Histogram showing the frequency of structures for a PLD value for all structures and group 1. The frequency has been normalized so that the histograms give an area of 1.

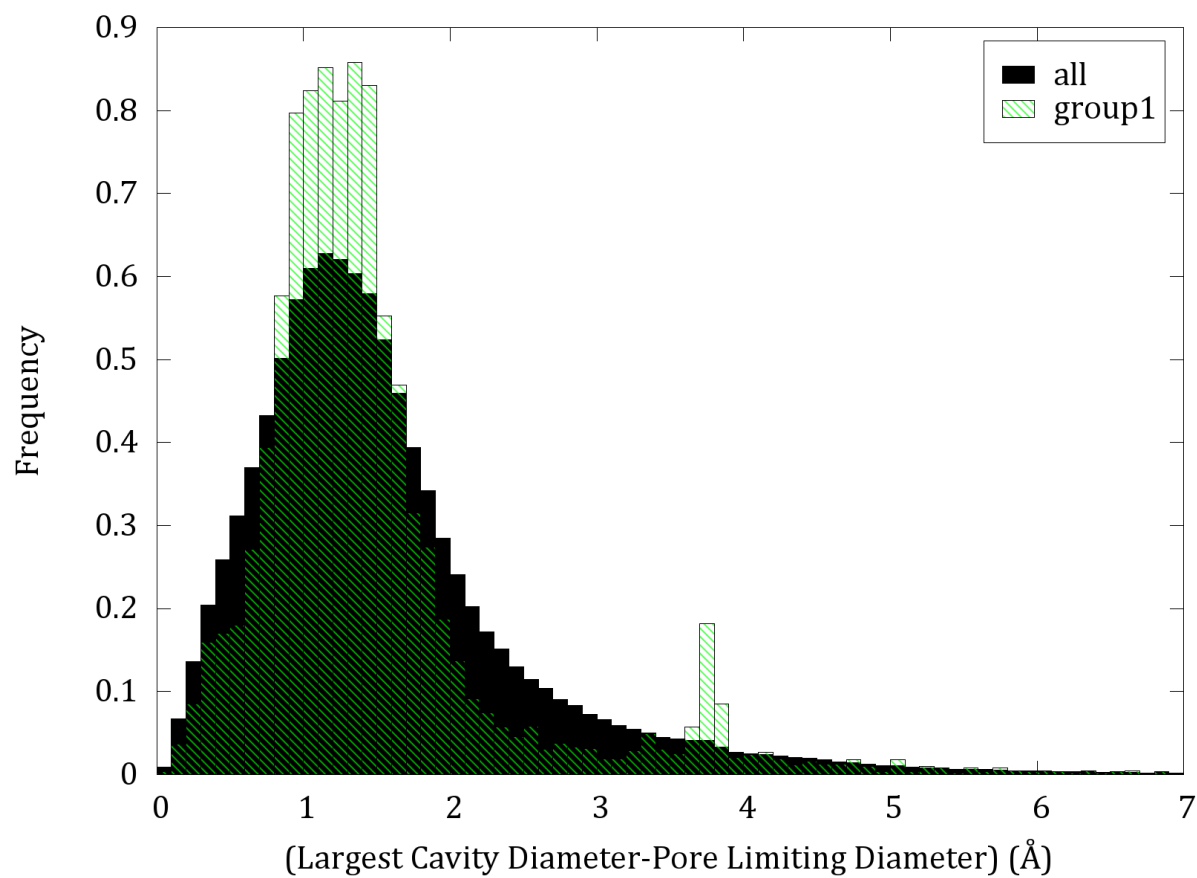

**Figure S.4:** Histogram showing the frequency of structures with specified values of (LCD-PLD) for all structures and group 1. The frequency has been normalized so that the histograms give an area of 1.

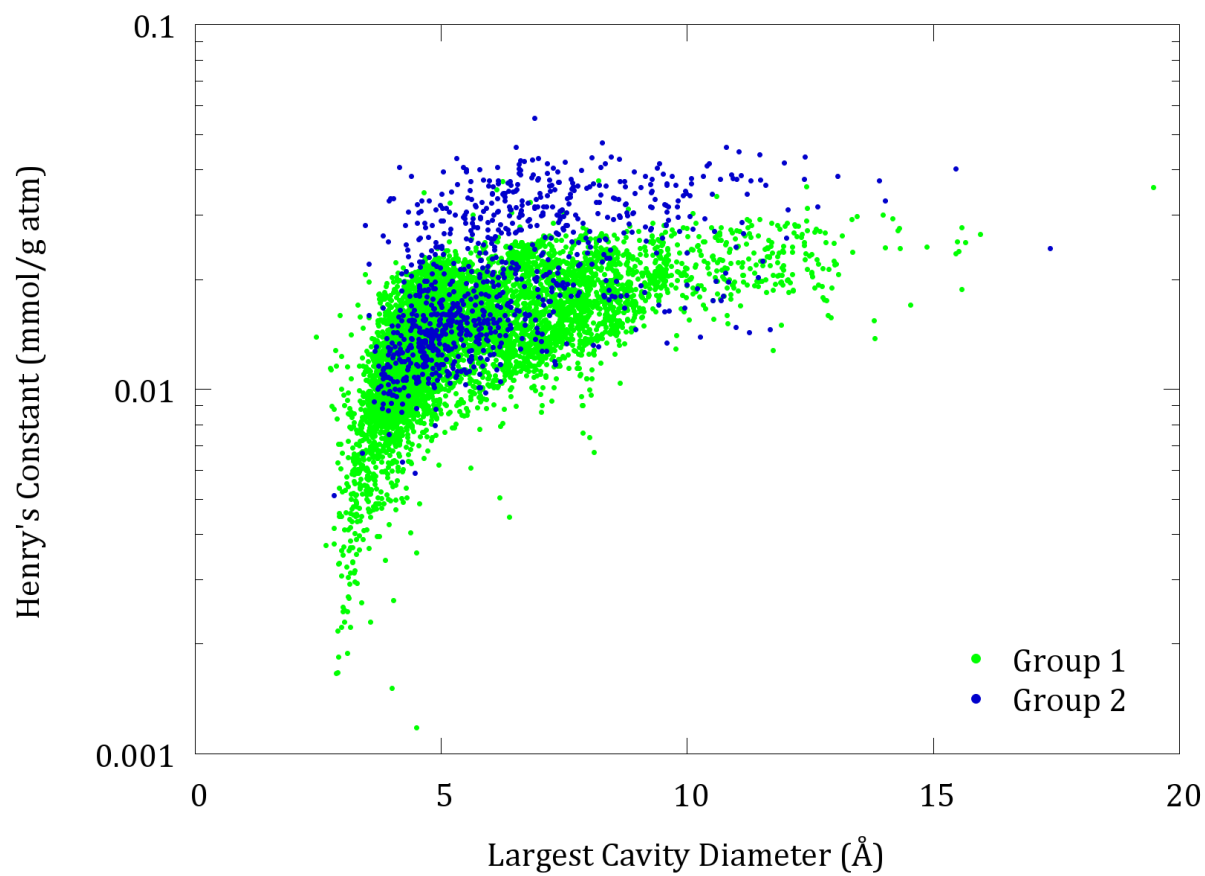

**Figure S.5:** The Henry's constant for H<sub>2</sub> plotted against the LCD values for the structures in group 1 and group 2.

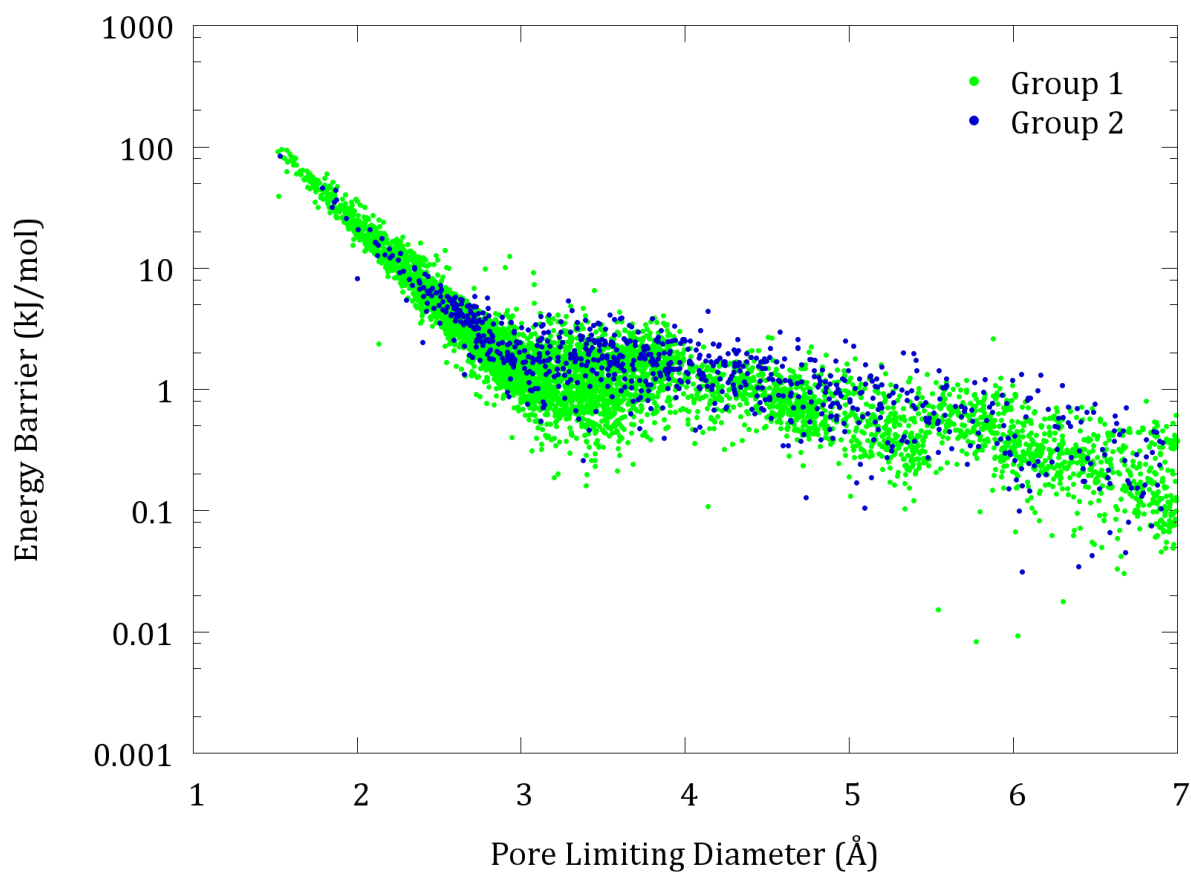

**Figure S 6:** The energy barrier to diffusion of H<sub>2</sub> plotted against the PLD values for the structures in group 1 and group 2.
